# Supplementary material for: Persistent Arthralgia Associated with Chikungunya Virus Outbreak, US Virgin Islands, December 2014–February 2016
Source: PubMed Central journal article supplement (PMC5367425; doi:10.3201/eid2304.161562), 2017-04
Supplement: 16-1562-Techapp-s1.pdf [file 16-1562-Techapp-s1.pdf]

# Persistent Arthralgia Associated with Chikungunya Virus Outbreak, US Virgin Islands, December 2014–February 2016

## Technical Appendix

**Technical Appendix Table 1.** Number of nonsymptomatic controls tested for CHIKV antibodies and interviewed

| Variable           | Nonsymptomatic control group |
|--------------------|------------------------------|
| No. tested for IgG | 134                          |
| No. IgG negative   | 33                           |
| No. IgG positive*  | 12                           |
| Total interviewed  | 167                          |

\*Persons who tested positive for CHIKV IgG were excluded from the analysis.

**Technical Appendix Table 2.** Enrollment and follow-up of CHIKV cases from December 2014–February 2016

| Enrollment period                         | No. enrolled |
|-------------------------------------------|--------------|
| 6-mo enrollment                           |              |
| Laboratory-confirmed CHIKV cases          | 457          |
| Missing phone number                      | 116          |
| Incorrect phone number or not in service  | 93           |
| Did not answer the phone after 3 attempts | 70           |
| Refused to participate                    | 11           |
| Died                                      | 2            |
| Total enrolled in the 6 mo follow-up      | 165          |
| 12-mo follow-up                           |              |
| CHIK cases interviewed at 6 mo            | 165          |
| Incorrect phone number or not in service  | 9            |
| Did not answer the phone after 3 attempts | 24           |
| Refused to participate                    | 4            |
| Total enrolled in the 12 mo follow-up     | 128          |
